# Supplementary material for: Band gap tuning from an indirect EuGa2S4 to a direct EuZnGeS4 semiconductor: syntheses, crystal and electronic structures, and optical properties
Source: Royal Society of Chemistry journal article supplement (doi:10.1039/c6ra25283d), 2017-01-01
Supplement: c6ra25283d5.pdf [file c6ra25283d5.pdf]

## ***Supporting Information***

### **Band Gap Tuning from Indirect EuGa<sub>2</sub>S<sub>4</sub> to Direct EuZnGeS<sub>4</sub> Semiconductor: Syntheses, Crystal and Electronic Structures, and Optical Properties**

Yang Chi, Sheng-Ping Guo\* and Huai-Guo Xue

*College of Chemistry & Chemical Engineering, Yangzhou University, Yangzhou, Jiangsu  
225002, P. R. China*

*Corresponding authors: [spguo@yzu.edu.cn](mailto:spguo@yzu.edu.cn)*

**Table S1.** Atomic coordinates ( $\times 10^4$ ) and equivalent isotropic displacement parameters ( $U_{\text{eq}}^a$ ,  $\text{\AA}^2 \times 10^3$ ) for **1–4**.

| atom     | <i>x</i> | <i>y</i> | <i>z</i> | $U_{\text{eq}}/\text{\AA}^2$ |
|----------|----------|----------|----------|------------------------------|
| <b>1</b> |          |          |          |                              |
| Eu(1)    | 6250     | 3732(1)  | 1250     | 9(1)                         |
| Eu(2)    | 6250     | 6250     | 1250     | 9(1)                         |
| Eu(3)    | 6250     | 6250     | 6250     | 10(1)                        |
| Zn(1)    | 5541(1)  | 4998(1)  | 4138(1)  | 6(1)                         |
| Ge(1)    | 7375(1)  | 5005(1)  | 3741(1)  | 11(1)                        |
| S(1)     | 6550(2)  | 5009(2)  | 4956(3)  | 7(1)                         |
| S(2)     | 5794(2)  | 4988(2)  | 2351(3)  | 7(1)                         |
| S(3)     | 7503(2)  | 5830(2)  | 2487(4)  | 14(1)                        |
| S(4)     | 5000(2)  | 4167(2)  | 5007(4)  | 14(1)                        |
| <b>2</b> |          |          |          |                              |
| Eu(1)    | 1250     | 1250     | 3768(1)  | 9(1)                         |
| Eu(2)    | 1250     | 1250     | 6250     | 10(1)                        |
| Eu(3)    | 1250     | 1250     | 1250     | 10(1)                        |
| Ga(1)    | 1263(1)  | -122(1)  | 2506(1)  | 8(1)                         |
| Ga(2)    | -1642(1) | 539(1)   | 2502(1)  | 8(1)                         |
| S(1)     | 150(1)   | 789(1)   | 2513(1)  | 8(1)                         |
| S(2)     | 2547(1)  | 944(1)   | 5008(1)  | 9(1)                         |
| S(3)     | 11(2)    | 1(1)     | 4168(1)  | 8(1)                         |
| S(4)     | 2511(2)  | 4(1)     | 3328(1)  | 9(1)                         |
| <b>3</b> |          |          |          |                              |
| Eu(1)    | 6250     | 1250     | 1250     | 13(1)                        |
| Eu(2)    | 8750     | 1282(1)  | 3750     | 14(1)                        |
| Eu(3)    | 8750     | 3750     | 3750     | 13(1)                        |
| In(1)    | 6260(1)  | 2507(1)  | 2619(1)  | 13(1)                        |
| In(2)    | 9092(1)  | 2501(1)  | 1962(1)  | 13(1)                        |
| S(1)     | 7320(1)  | 2515(1)  | 1626(1)  | 12(1)                        |
| S(2)     | 9992(2)  | 1605(1)  | 2503(1)  | 13(1)                        |
| S(3)     | 5019(2)  | 1614(1)  | 2502(1)  | 14(1)                        |
| <b>4</b> |          |          |          |                              |
| Eu(1)    | 6250     | 1250     | 1250     | 13(1)                        |
| Eu(2)    | 8750     | 1276(1)  | 3750     | 13(1)                        |
| Eu(3)    | 8750     | 3750     | 3750     | 14(1)                        |
| In(1)    | 6253(1)  | 2505(1)  | 2611(1)  | 11(1)                        |
| In(2)    | 9118(1)  | 2501(1)  | 1957(1)  | 12(1)                        |
| Se(1)    | 7324(1)  | 2514(1)  | 1610(1)  | 9(1)                         |
| Se(2)    | 9987(1)  | 1590(1)  | 2501(1)  | 11(1)                        |
| Se(3)    | 5013(1)  | 1598(1)  | 2499(1)  | 11(1)                        |

<sup>a</sup> $U_{eq}$  is defined as one third of the trace of the orthogonalized  $U_{ij}$  tensor.

**Table S2.** Selected bond distances (Å) of **1–4**.<sup>a</sup>

| Bond          | Dist.    | Bond           | Dist.    | Bond           | Dist.    |
|---------------|----------|----------------|----------|----------------|----------|
| <b>1</b>      |          |                |          |                |          |
| Eu(1)–S(2)    | 3.070(4) | Eu(3)–S(1)     | 3.077(4) | Ge(1)–S(1)     | 2.246(4) |
| Eu(1)–S(4)#2  | 3.082(5) | Eu(3)–S(4)#10  | 3.100(5) | Ge(1)–S(3)#5   | 2.301(5) |
| Eu(1)–S(3)#4  | 3.112(5) | Zn(1)–S(2)     | 2.247(4) | Ge(1)–S(3)     | 2.309(5) |
| Eu(2)–S(2)    | 3.080(4) | Zn(1)–S(1)     | 2.288(4) | Ge(1)–S(2)#12  | 2.315(4) |
| Eu(2)–S(3)#1  | 3.095(5) | Zn(1)–S(4)#10  | 2.302(5) |                |          |
| Eu(2)–S(3)    | 3.095(5) | Zn(1)–S(4)     | 2.303(5) |                |          |
| <b>2</b>      |          |                |          |                |          |
| Eu(1)–S(1)    | 3.071(3) | Eu(3)–S(1)     | 3.085(3) | Ga(2)–S(1)     | 2.246(3) |
| Eu(1)–S(2)    | 3.076(3) | Eu(3)–S(4)#10  | 3.102(3) | Ga(2)–S(3)#10  | 2.294(2) |
| Eu(1)–S(3)    | 3.081(3) | Ga(1)–S(2)#10  | 2.243(2) | Ga(2)–S(3)#14  | 2.298(2) |
| Eu(1)–S(4)    | 3.113(3) | Ga(1)–S(4)#11  | 2.296(3) | Ga(2)–S(2)#15  | 2.303(2) |
| Eu(2)–S(2)    | 3.082(3) | Ga(1)–S(4)     | 2.299(3) |                |          |
| Eu(2)–S(3)#4  | 3.108(3) | Ga(1)–S(1)     | 2.305(2) |                |          |
| <b>3</b>      |          |                |          |                |          |
| Eu(1)–S(1)    | 3.078(2) | Eu(3)–S(4)     | 3.069(3) | In(2)–S(1)     | 2.413(2) |
| Eu(1)–S(3)    | 3.178(3) | Eu(3)–S(2)#10  | 3.194(2) | In(2)–S(2)     | 2.477(2) |
| Eu(2)–S(4)    | 3.063(3) | In(1)–S(4)     | 2.414(2) | In(2)–S(2)#11  | 2.479(2) |
| Eu(2)–S(1)#5  | 3.080(2) | In(1)–S(3)     | 2.472(2) | In(2)–S(4)#15  | 2.508(2) |
| Eu(2)–S(2)    | 3.158(2) | In(1)–S(3)#14  | 2.484(2) |                |          |
| Eu(2)–S(3)#2  | 3.213(2) | In(1)–S(1)     | 2.506(2) |                |          |
| <b>4</b>      |          |                |          |                |          |
| Eu(1)–Se(1)   | 3.206(2) | Eu(3)–Se(4)    | 3.190(2) | In(2)–Se(1)    | 2.536(8) |
| Eu(1)–Se(3)   | 3.288(2) | Eu(3)–Se(2)#10 | 3.306(2) | In(2)–Se(2)    | 2.591(2) |
| Eu(2)–Se(4)   | 3.194(2) | In(1)–Se(4)    | 2.530(8) | In(2)–Se(2)#12 | 2.601(2) |
| Eu(2)–Se(1)#5 | 3.202(2) | In(1)–Se(3)    | 2.599(1) | Se(4)–In(2)#13 | 2.621(8) |
| Eu(2)–Se(2)   | 3.272(2) | In(1)–Se(3)#14 | 2.603(1) |                |          |
| Eu(2)–Se(3)#1 | 3.323(2) | In(1)–Se(1)    | 2.621(8) |                |          |

<sup>a</sup>Symmetry transformations used to generate equivalent atoms: Compound **1**: #1  $-x+5/4, y, -z+1/4$ ; 2  $-x+5/4, -y+3/4, z-1/2$ ; #3  $x, -y+3/4, -z+3/4$ ; #4  $x-1/4, -y+1, z-1/4$ ; #5  $-x+3/2, -y+1, -z+1/2$ ; #6  $-x+5/4, -y+5/4, z$ ; #7  $x, -y+5/4, -z+1/4$ ; #8  $x, -y+5/4, -z+5/4$ ; #9  $-x+5/4, y, -z+5/4$ ; #10  $-x+1, -y+1, -z+1$ ; #11  $-x+1, y+1/4, z+1/4$ ; #12  $x+1/4, -y+1, z+1/4$ ; Compound **2**: #1  $-x+1/4, -y+1/4, z$ ; #2  $x, -y+1/4, -z+5/4$ ; #3  $-x+1/4, y, -z+5/4$ ; #4  $-x, -y, -z+1$ ; #5  $-x, y+1/4, z+1/4$ ; #6  $x+1/4, y+1/4, -z+1$ ; #7  $x+1/4, -y, z+1/4$ ; #8  $x, -y+1/4, -z+1/4$ ; #9  $-x+1/4, y, -z+1/4$ ; #10  $x-1/4, -y, z-1/4$ ; #11  $-x+1/2, -y, -z+1/2$ ; #12  $x-1/4, y+1/4, -z+1/2$ ; #13  $-x+1/2, y+1/4, z-1/4$ ; #14  $-x-1/4, y, -z+3/4$ ; #15  $x-1/2, -y+1/4, -z+3/4$ ; Compound **3**: #1  $x, -y+1/4, -z+1/4$ ; #2  $-x+5/4, -y+1/4, z$ ; #3  $-$

$x+5/4, y, -z+1/4$ ; #4  $-x+7/4, y, -z+3/4$ ; #5  $x+1/4, y-1/4, -z+1/2$ ; #6  $-x+3/2, y-1/4, z+1/4$ ; #7  $x+1/2, -y+1/4, -z+3/4$ ; #8  $-x+7/4, -y+3/4, z$ ; #9  $x, -y+3/4, -z+3/4$ ; #10  $-x+2, y+1/4, z+1/4$ ; #11  $-x+2, -y+1/2, -z+1/2$ ; #12  $x-1/4, y+1/4, -z+1/2$ ; #13  $x-1/4, -y+1/2, z+1/4$ ; #14  $-x+1, -y+1/2, -z+1/2$ ; #15  $x+1/4, -y+1/2, z-1/4$ ; Compound 4: #1  $-x+5/4, -y+1/4, z$ ; #2  $x, -y+1/4, -z+1/4$ ; #3  $-x+5/4, y, -z+1/4$ ; #4  $-x+7/4, y, -z+3/4$ ; #5  $-x+3/2, y-1/4, z+1/4$ ; #6  $x+1/4, y-1/4, -z+1/2$ ; #7  $x+1/2, -y+1/4, -z+3/4$ ; #8  $-x+7/4, -y+3/4, z$ ; #9  $x, -y+3/4, -z+3/4$ ; #10  $-x+2, y+1/4, z+1/4$ ; #11  $x-1/4, y+1/4, -z+1/2$ ; #12  $-x+2, -y+1/2, -z+1/2$ ; #13  $x-1/4, -y+1/2, z+1/4$ ; #14  $-x+1, -y+1/2, -z+1/2$ .

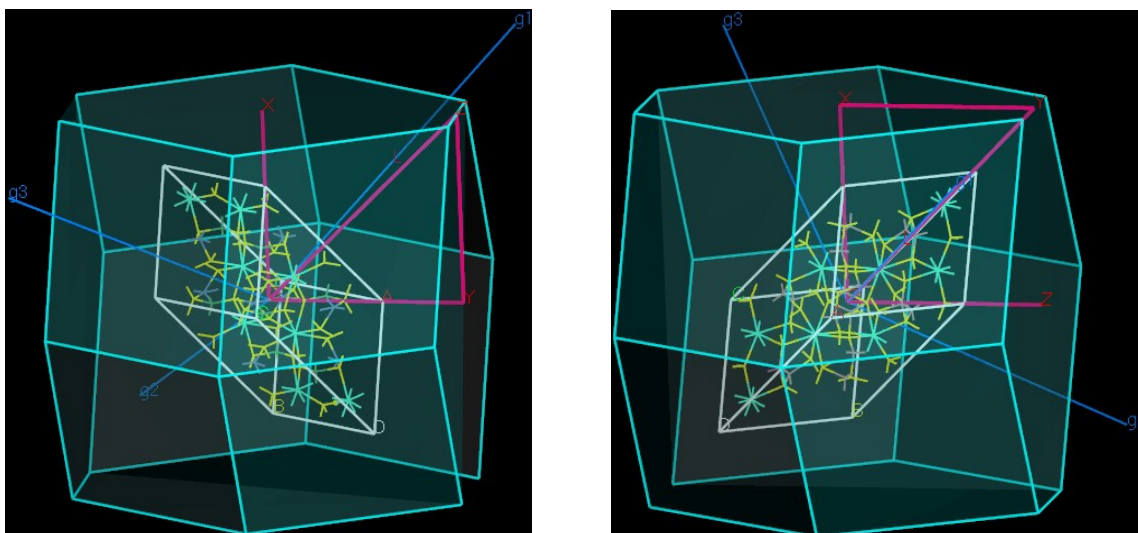

**Fig. S1** The Brillouin zones of **1** (left) and **2** (right), respectively.
